# Supplementary material
Source: PubMed Central journal article supplement (PMC1247706)
Supplement: cmaj_173_8_905__1.pdf [file cmaj_173_8_905__1.pdf]

**e-Table 4: Randomized studies comparing methotrexate (MTX) with laparoscopic salpingostomy (LS) for the treatment of ectopic pregnancy [unabridged]\***

| Study (no. of patients)                   | Patient profile                                                                                                   | MTX treatment                                       | Treatment success rate, % |    |                                     | Other outcomes                                                                                                                                               |           | Comments                                                                                  |
|-------------------------------------------|-------------------------------------------------------------------------------------------------------------------|-----------------------------------------------------|---------------------------|----|-------------------------------------|--------------------------------------------------------------------------------------------------------------------------------------------------------------|-----------|-------------------------------------------------------------------------------------------|
|                                           |                                                                                                                   |                                                     | MTX                       | LS | RR or OR (95% CI)                   | MTX                                                                                                                                                          | LS        |                                                                                           |
| Hajenius et al, 1997 <sup>56</sup> (100)  | No tubal rupture; no fetal cardiac activity                                                                       | 4 doses                                             | 82                        | 72 | RR 1–2 (0.93–1.4)                   | <i>Tubal preservation rate, %</i><br>90<br>(RR 0.98; 95% CI 0.87–1.1)                                                                                        | 92        | All patients underwent laparoscopy for diagnosis or treatment                             |
| Fernandez et al, 1998 <sup>57</sup> (100) | Pretherapeutic score < 13; no suspicion of tubal rupture                                                          | Single dose intramuscularly or transvaginally       | 88                        | 96 | OR 0.32 (0.03–1.92)                 | <i>Pregnancy rate, %</i><br>96<br>(OR, 15.9; CI, 1.9–709.5)<br><i>Recurrent ectopic pregnancy rate, %</i><br>3<br>(OR 0.18; 95% CI 0.004–1.721) <sup>†</sup> | 62        | One of a few centres using a scoring system and local MTX injection for ectopic pregnancy |
| Saraj et al, 1998 <sup>58</sup> (75)      | Body weight < 90 kg; no fetal cardiac activity; tubal gestational sac < 3.5 cm and not ruptured                   | Single dose (1 mg/kg) intramuscularly               | 95                        | 91 | OR 2.25 (0.29–26.2)                 | <i>Tubal patency rate, %</i><br>73<br>(OR 0.83; 95% CI 0.21–3.29)<br><i>Pregnancy rate, %</i><br>28<br>(OR, 0.96; CI, 0.16–6.22) <sup>†</sup>                | 76        | The study was underpowered                                                                |
| Sowter et al, 2001 <sup>59</sup> (62)     | Tubal gestational sac < 3.5 cm; $\beta$ -hCG level < 5000 IU/L; no fetal cardiac activity; minimal hemoperitoneum | Single dose (50 mg/m <sup>2</sup> ) intramuscularly | 65                        | 93 | 95% CI 10–47 for difference in rate | <i><math>\beta</math>-hCG clearance time, d</i><br>28 (14–71)                                                                                                | 15 (5–49) | This study represents the general clinical management of ectopic pregnancy                |

Note: RR = relative risk, CI = confidence interval, OR = odds ratio.

\*An abridged version of this table was published with the article and is available at [www.cmaj.ca/cgi/content/full/178/8/905](http://www.cmaj.ca/cgi/content/full/178/8/905).

<sup>†</sup>Calculated OR.
